# Supplementary material for: Chromophore Protonation State Controls Photoswitching of the Fluoroprotein asFP595
Source: PLoS Comput Biol. 2008 Mar 21;4(3):e1000034. doi: 10.1371/journal.pcbi.1000034 (PMC2274881; doi:10.1371/journal.pcbi.1000034)
Supplement: Table S3 — RASSCF(18,7+4+5)2,2/6-31G* results on Ztrans. (0.03 MB DOC) [file pcbi.1000034.s009.doc]

**Table S2. RASSCF(18,7+4+5)[2,2]/6-31G* results on A*trans*.**

| Geometry | S0 energy  (a.u.) | S1 energy  (a.u.) | S1 – S0 (kcal/mol) | E(S1)a  (kcal/mol) |
| --- | --- | --- | --- | --- |
| S0 planar | -754.31049 | -754.18584 | 78.2 | 7.3 |
| S1 planar | -754.29789 | -754.19747 | 63.0 | 0.0 |
| S1 torsion A | -754.25287 | -754.20354 | 31.0 | -3.8 |
| S1 torsion B | -754.23512 | -754.21686 | 11.5 | -12.2 |
| S1/S0 MECIb | -754.20902 | -754.20900 | 0.0 | -7.2 |

a Relative energy to the S1 planar minimum energy.

b The structure is not fully optimized because of convergence difficulties. However, since the S1–S0 energy difference is zero, the reported structure is on the conical intersection hyperline near the minimum, and complete optimization can only further reduce the 5 kcal/mol energy difference to the lowest S1 minimum.
