# Supplementary material for: Chromophore Protonation State Controls Photoswitching of the Fluoroprotein asFP595
Source: PLoS Comput Biol. 2008 Mar 21;4(3):e1000034. doi: 10.1371/journal.pcbi.1000034 (PMC2274881; doi:10.1371/journal.pcbi.1000034)
Supplement: Text S4 — Diabatic Surface Hopping: Theory and Implementation. (0.06 MB DOC) [file pcbi.1000034.s016.doc]

**Text S3) Conformational flooding simulations of the zwitterionic chromophores**

Figure S6 shows the results obtained from conformational flooding simulations of *Zcis*. Similar results were obtained for *Ztrans* (data not shown). Starting in the planar S1 cis minimum, the flooding potential Vfl induced an isomerization in the S1 state to the trans conformation within less than 0.5 ps. During the isomerization, the S1/S0 energy gap decreased significantly (Figure S6, b), but no spontaneous surface crossing back to S0 was observed. Figure S6, a) shows the structure along an isomerization trajectory at which the S1/S0 energy gap was minimal. The chromophore adopted a hula-twist conformation with the ring-bridging CH group pointing upwards (towards His197). In the hula-twist mechanism, both ring-bridging torsion angles rotated simultaneously, as shown in Figure S6, c. After excitation to S1, the flooding potential Vfl (inset of b) induced the crossing of the S1 barrier that separates the planar minimum from the hula-twisted conformation. Upon the barrier crossing, the chromophore escaped the influence of the flooding potential and Vfl dropped to (almost) zero. We imposed a surface hop at the structure with the minimal S1/S0 energy gap and switched off the flooding potential to allow an unperturbed relaxation on the S0 surface.

As an additional test for our assignment of the zwitterion to be the fluorescent species, we have carried out three excited state QM/MM simulations in which we applied a constant flooding potential (1 ps, Vfl = 100 kJ/mol). From these simulations, we obtained an expected acceleration according to  = exp[F0/kBT] with F0 = - kBT ln <exp[-Vfl/kBT]>, where the angle brackets denote an appropriate time-average (data not shown). The acceleration thus obtained is a lower bound for the estimated decay time, in particular for the case at hand, where we must assume that the CI is accessed in a two-step process involving (i) chromophore isomerization and (ii) skeletal deformation. From the additional constant flooding simulations, we estimate a lower bound for the decay time of about 1 ns, which is in qualitative agreement with the measured fluorescence lifetime of 2.2 ns.
